# Supplementary material for: Fabrication of a Cu/Zn co-incorporated calcium phosphate scaffold-derived GDF-5 sustained release system with enhanced angiogenesis and osteogenesis properties
Source: Royal Society of Chemistry journal article supplement (doi:10.1039/c8ra05441j), 2018-01-01

### Electronic Supplementary Information

**Supplementary Fig. S1** Metallic ions release from the scaffolds P2 at various pH solution: (a) Cu, (b) Zn and (c) Ca ions.

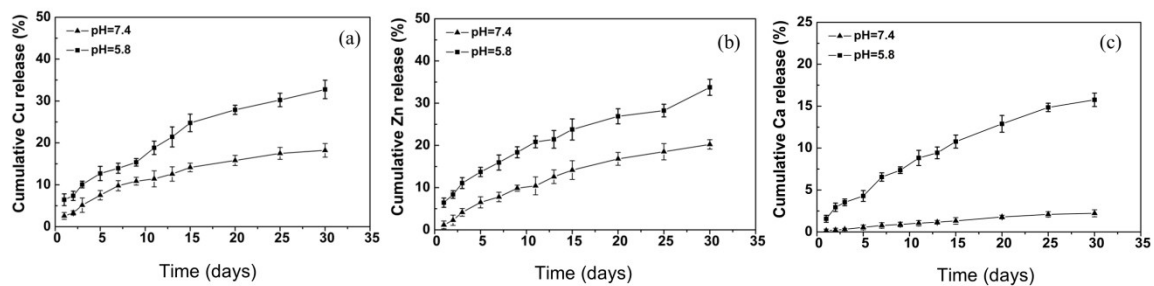

**Supplementary Fig. S2** Alizarin red S staining of BMSCs mineralization after 21 days of culture in different medium: (a) blank culture medium, (b) Zn<sup>2+</sup>-added culture medium, (c) Cu<sup>2+</sup>-added culture medium and (d) the extraction medium.

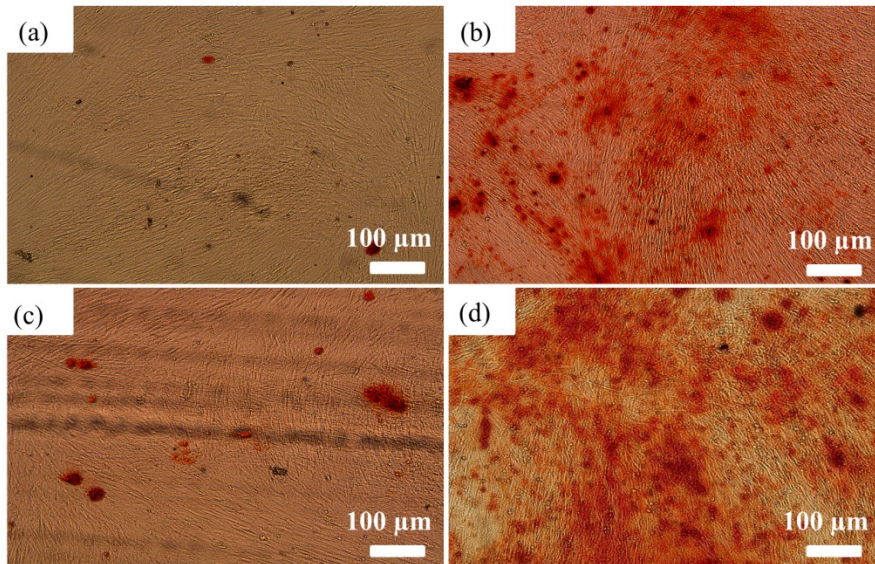

**Supplementary Fig. S3** In vitro angiogenesis of VECs cultured on Matrigel-coated wells with different medium: (a) blank culture medium, (b)  $Zn^{2+}$ -added culture medium, (c)  $Cu^{2+}$ -added culture medium and (d) the extraction medium.

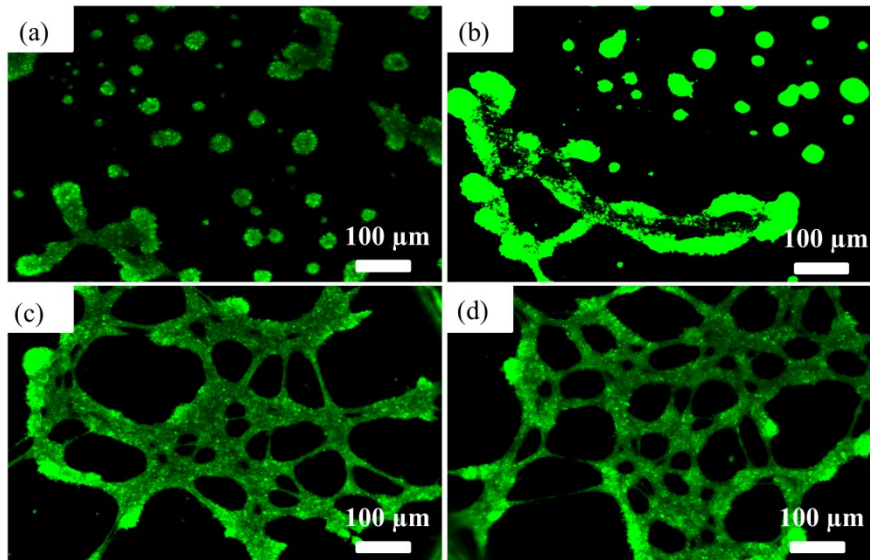

Supplement: c8ra05441j1.pdf [file c8ra05441j1.pdf]
